# Supplementary material for: Dynamics of G6PD activity in patients receiving weekly primaquine for therapy of Plasmodium vivax malaria
Source: PLoS Negl Trop Dis. 2021 Sep 8;15(9):e0009690. doi: 10.1371/journal.pntd.0009690 (PMC8452019; doi:10.1371/journal.pntd.0009690)
Supplement: S1 Table — (XLSX) [file pntd.0009690.s005.xlsx]

## Sheet: Sheet1
	D7-D0 Δ G6PD activity U/gHb	%D7-D0 Δ G6PD activity U/gHb	D7 D0 Δ absolute reticulocytaemia x106/µL	G6PD status	Sex	D7 G6PD activity	D0 G6PD activity	D0 RBC ct x 10⁶/µL	D0 % reticulocytaemia	D0 absolute reticulocytaemia x10⁶/µL	D7 RBC ct x 10⁶/µL	D7 % reticulocytaemia	D7 absolute reticulocytaemia x10⁶/µL
Patients with a decline or no change in G6PD activity	-5.50739	-32.8249	0.08862	WT	M	11.2707	16.7781	5.17	1.2	0.06204	5.58	2.7	0.15066
	-4.6	-36.2205	-0.04263	WT	M	8.1	12.7	5.01	2.5	0.12525	4.86	1.7	0.08262
	-2.33236	-16.6995	0.00842	WT	M	11.6343	13.9666	6.02	1.1	0.06622	6.22	1.2	0.07464
	-2	-17.2414	-0.14772	WT	M	9.6	11.6	5.55	4.5	0.24975	5.37	1.9	0.10203
	-1.4	-11.3821	0.03607	WT	M	10.9	12.3	5.06	1.3	0.06578	4.85	2.1	0.10185
	-1.24846	-11.4715	0.05813	WT	M	9.63464	10.8831	4.99	1.6	0.07984	5.11	2.7	0.13797
	-1.2	-10.5263	0.0506	WT	M	10.2	11.4	4.78	1.4	0.06692	4.52	2.6	0.11752
	-0.9	-6.71641	0.03132	WT	M	12.5	13.4	4.59	1	0.0459	4.29	1.8	0.07722
	-0.81543	-69.1628	0.01685	Viangchan	M	0.363571	1.179	3.65	1.5	0.05475	3.58	2	0.0716
	-0.8	-6.50407	0.03798	WT	M	11.5	12.3	4.79	0.8	0.03832	5.45	1.4	0.0763
	-0.524519	-5.56105	0.02223	WT	F	8.9075	9.43201	5.05	0.9	0.04545	4.23	1.6	0.06768
	-0.512097	-3.40152	0.0412	WT	M	14.5428	15.0549	5.96	1	0.0596	5.6	1.8	0.1008
	-0.5	-4.90196	0.02071	WT	M	9.7	10.2	4.97	1.3	0.06461	4.74	1.8	0.08532
	-0.5	-3.73134	0.01617	WT	M	12.9	13.4	3.71	1.8	0.06678	3.95	2.1	0.08295
	-0.361968	-49.8895	0.05833	Canton	M	0.363571	0.72554	4.29	1.9	0.08151	3.68	3.8	0.13984
	-0.331114	-2.25367	0.01462	WT	M	14.3611	14.6922	4.31	1	0.0431	4.81	1.2	0.05772
	-0.3	-2.7027	0.03953	WT	M	10.8	11.1	4.19	2.7	0.11313	4.49	3.4	0.15266
	-0.2	-2.10526	0.00402	WT	M	9.3	9.5	4.77	1.4	0.06678	4.72	1.5	0.0708
	-0.1	-0.833337	-0.01757	WT	M	11.9	12	5.69	1.3	0.07397	5.64	1	0.0564
	0	0	0.03342	WT	M	14.8	14.8	3.86	3.6	0.13896	4.42	3.9	0.17238
Patients with a rise in G6PD activity	6	82.1918	0.2421	WT	F	13.3	7.3	4.02	1.5	0.0603	4.32	7	0.3024
	5.65359	68.5033	0.05655	WT	M	13.9066	8.25301	4.77	1.3	0.06201	4.94	2.4	0.11856
	5.5	79.7101	0.05146	WT	M	12.4	6.9	4.06	0.6	0.02436	4.46	1.7	0.07582
	4.46978	61.6062	0.12504	WT	F	11.7252	7.2554	4.62	0.8	0.03696	4.5	3.6	0.162
	4.36546	370.267	-0.06752	Viangchan	F	5.54446	1.179	4.37	3.8	0.16606	3.79	2.6	0.09854
	4.1	30.8271	-0.01539	WT	M	17.4	13.3	4.63	3	0.1389	5.37	2.3	0.12351
	3.1	33.3333	0.06012	WT	F	12.4	9.3	5.06	1.8	0.09108	4.32	3.5	0.1512
	2.9238	42.4192	0.10357	WT	M	9.81642	6.89262	4.61	0.5	0.02305	4.87	2.6	0.12662
	2.11538	18.8103	0.0482	WT	M	13.3612	11.2459	5.32	1.3	0.06916	4.89	2.4	0.11736
	1.9	17.4312	-0.00129	WT	M	12.8	10.9	5.16	1.4	0.07224	4.73	1.5	0.07095
	1.8	16.0714	0.0556	WT	M	13	11.2	4.66	1.5	0.0699	5.02	2.5	0.1255
	1.7458	20.4784	0.10456	WT	M	10.2709	8.52509	4.88	1.8	0.08784	4.81	4	0.1924
	1.7	18.2796	0.00796	WT	F	11	9.3	4.7	1	0.047	4.58	1.2	0.05496
	1.30095	10.1019	0.02804	WT	F	14.1793	12.8783	4.7	1.4	0.0658	4.08	2.3	0.09384
	1.3	144.444	0.07262	Viangchan	F	2.2	0.9	4.46	0.8	0.03568	3.61	3	0.1083
	1.3	162.5	0.16336	Viangchan	M	2.1	0.8	4.48	0.6	0.02688	3.28	5.8	0.19024
	1.2	200	-0.00386	Viangchan	M	1.8	0.6	4.77	1.8	0.08586	4.1	2	0.082
	1.2	10	0.00497	WT	M	13.2	12	5.1	1.2	0.0612	5.09	1.3	0.06617
	1.2	11.1111	0.03814	WT	F	12	10.8	4.46	1.1	0.04906	4.36	2	0.0872
	1.1	10.6796	-0.00048	WT	M	11.4	10.3	4.79	1.6	0.07664	4.76	1.6	0.07616
	1	9.09091	0.02658	WT	M	12	11	5.2	1.6	0.0832	4.99	2.2	0.10978
	1	142.857	0.09924	Viangchan	M	1.7	0.7	4.26	2.6	0.11076	3.5	6	0.21
	0.9	7.62712	0.03311	WT	M	12.7	11.8	4.39	0.7	0.03073	4.56	1.4	0.06384
	0.748181	7.85681	0.01436	WT	M	10.2709	9.52271	5.27	2.8	0.14756	5.06	3.2	0.16192
	0.661294	5.83329	0.08212	WT	M	11.9978	11.3366	5.2	1.1	0.0572	5.16	2.7	0.13932
	0.637853	87.9142	-0.0253	Viangchan	M	1.36339	0.72554	4.93	2.2	0.10846	3.96	2.1	0.08316
	0.6	120		Viangchan	M	1.1	0.5	4.67	1.4	0.06538
	0.6	50	0.01872	Viangchan	M	1.8	1.2	4.61	1.6	0.07376	5.78	1.6	0.09248
	0.572004	4.74217	0.0123	WT	M	12.6341	12.0621	6.06	1.1	0.06666	5.64	1.4	0.07896
	0.5	3.81679	-0.0175	WT	M	13.6	13.1	5.04	1.8	0.09072	5.23	1.4	0.07322
	0.5	4.58716	-0.06464	WT	M	11.4	10.9	5.04	2.8	0.14112	4.78	1.6	0.07648
	0.480512	4.07558	0.00979	WT	M	12.2705	11.79	5.72	1.3	0.07436	4.95	1.7	0.08415
	0.4	36.3636	0.05273	Viangchan	M	1.5	1.1	5.83	1.6	0.09328	4.71	3.1	0.14601
	0.4	44.4444	0.05208	Viangchan	M	1.3	0.9	4.41	1.2	0.05292	3.75	2.8	0.105
	0.4	3.25203	0.09154	WT	M	12.7	12.3	4.66	1.1	0.05126	5.1	2.8	0.1428
	0.308544	1.90061	0.01152	WT	F	16.5425	16.234	4.13	1.6	0.06608	3.88	2	0.0776
	0.3	30	0.10488	Viangchan	M	1.3	1	5.87	2.4	0.14088	5.12	4.8	0.24576
	0.3	42.8571	0.04813	Viangchan	M	1	0.7	4.43	1.9	0.08417	3.78	3.5	0.1323
	0.210638	1.61288	0.02294	WT	M	13.2704	13.0597	5.2	1.3	0.0676	5.03	1.8	0.09054
	0.209637	1.66296	-0.08214	WT	M	12.8159	12.6062	6.66	1.8	0.11988	6.29	0.6	0.03774
	0.115738	1.02916	0.05212	WT	M	11.3616	11.2459	5.96	0.7	0.04172	5.52	1.7	0.09384
	0.0938983	6.90232	0.06514	Viangchan	M	1.45429	1.36039	4.82	1.2	0.05784	4.73	2.6	0.12298
